# Supplementary material
Source: PubMed Central journal article supplement (PMC4272635)

# Wright et al, Supplementary Figure 1

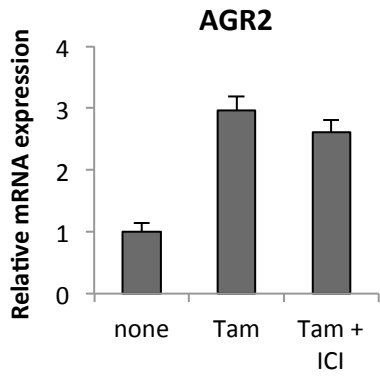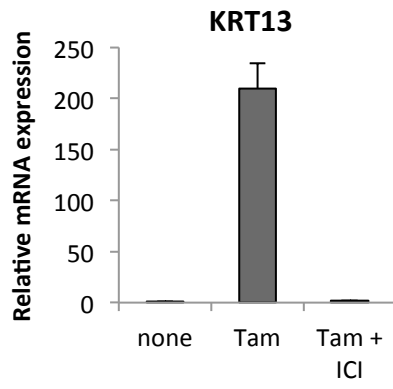

Supplement: NIHMS620369-supplement-2.pdf [file NIHMS620369-supplement-2.pdf]

**MCF7**

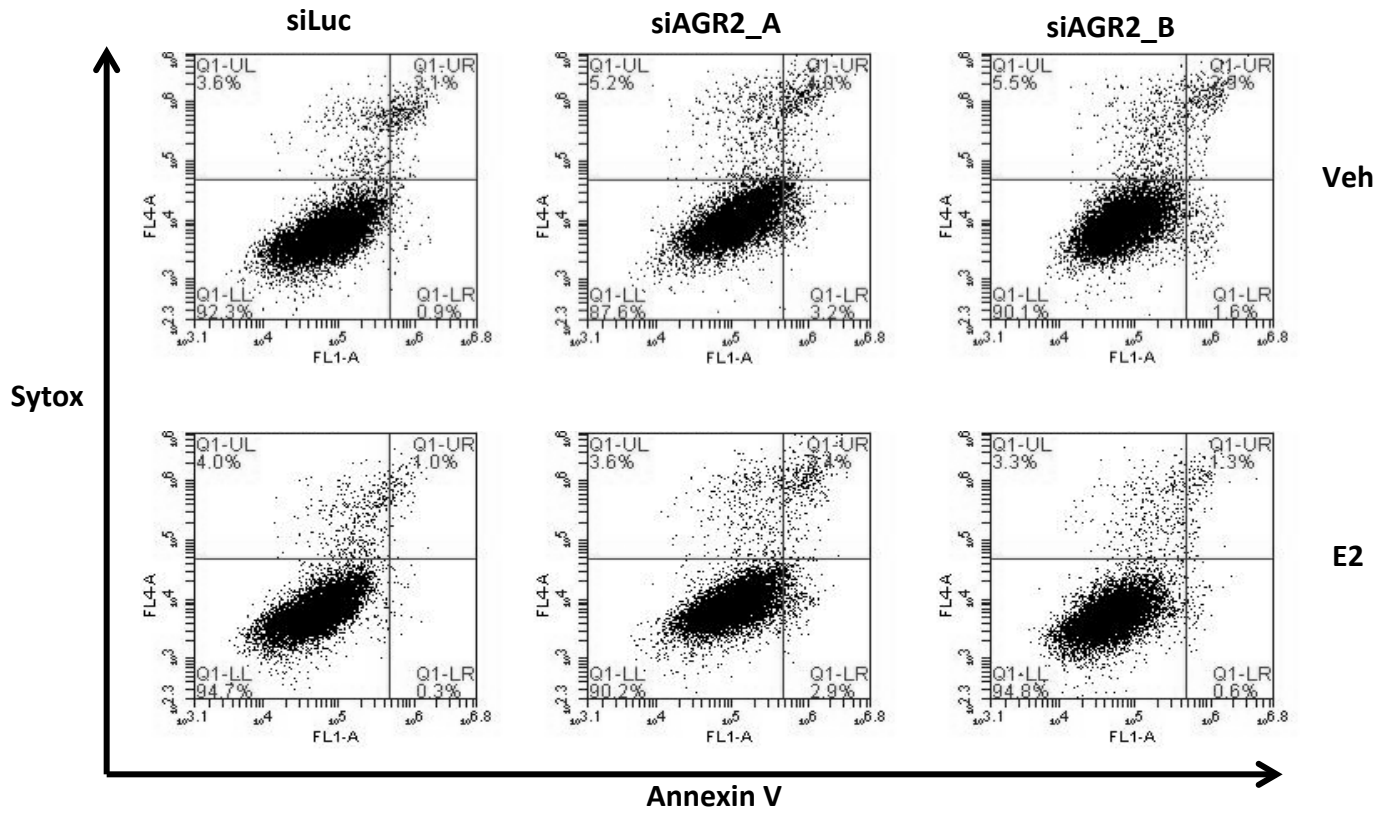

**TamR**

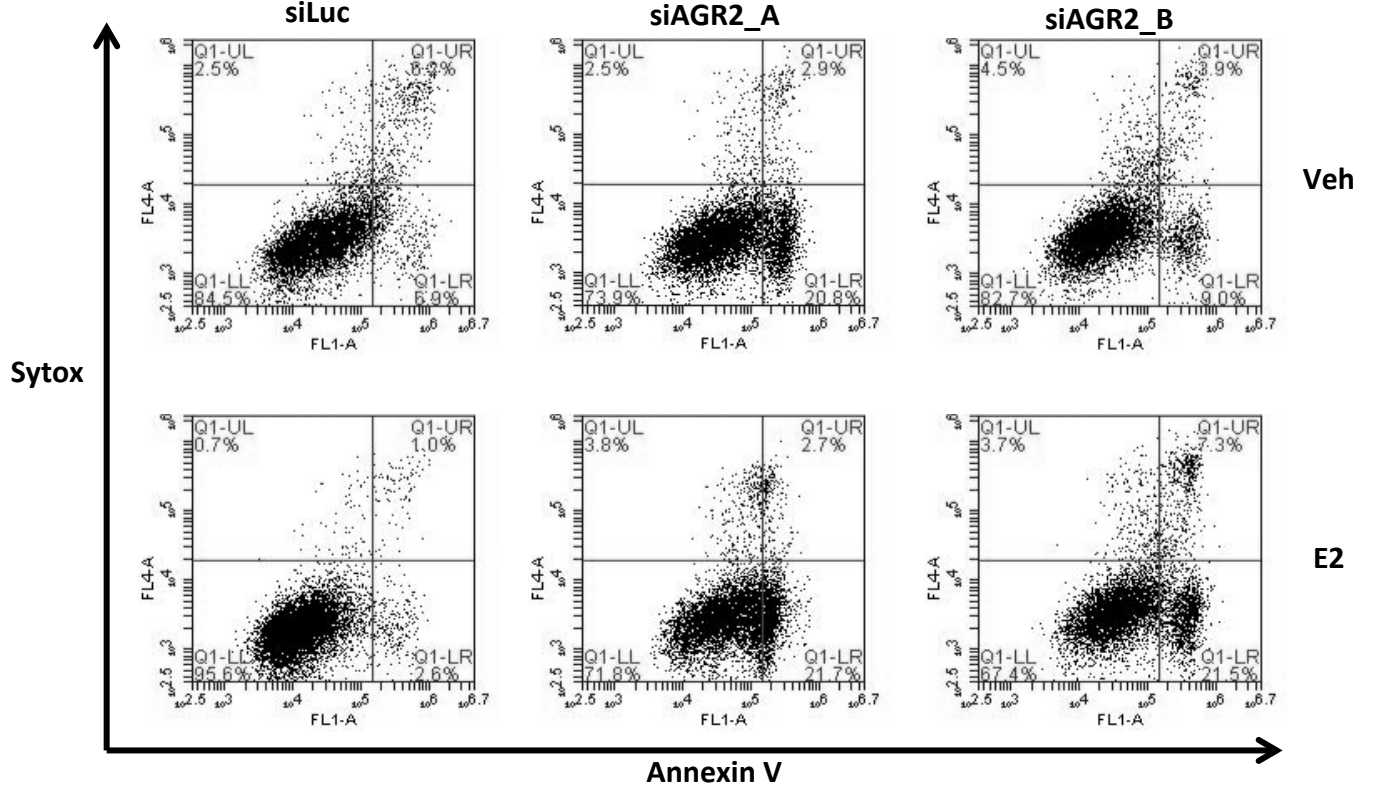

Supplement: NIHMS620369-supplement-3.pdf [file NIHMS620369-supplement-3.pdf]

**MCF7**

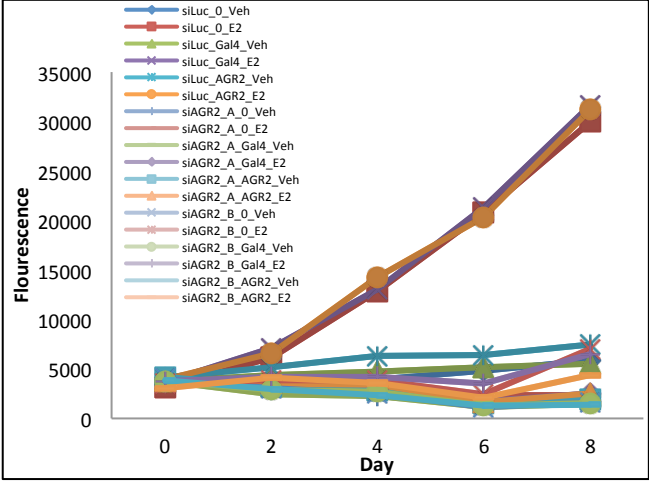

**TamR**

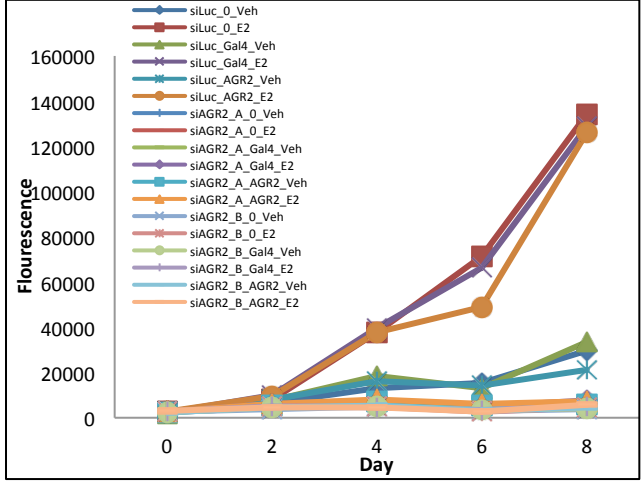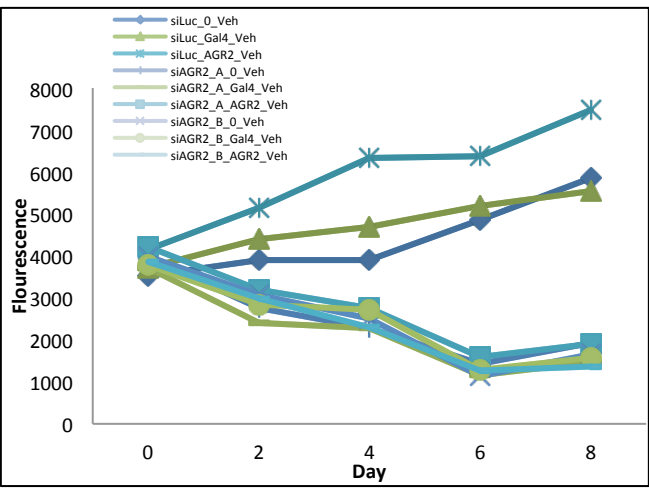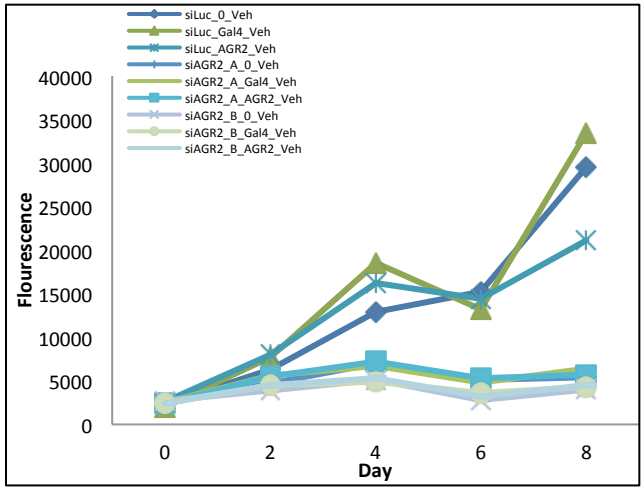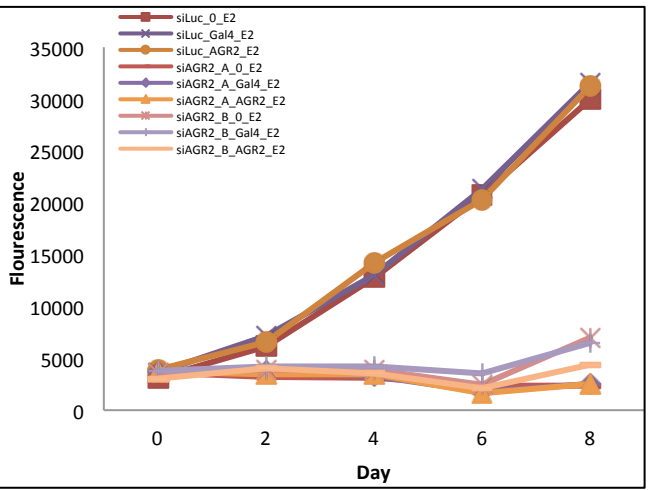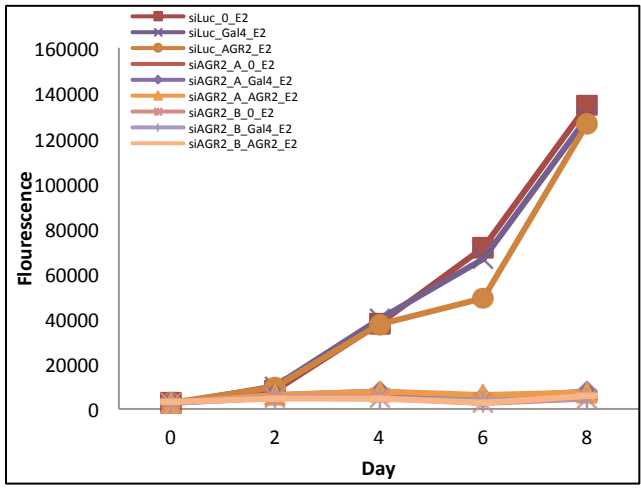

Supplement: NIHMS620369-supplement-4.pdf [file NIHMS620369-supplement-4.pdf]

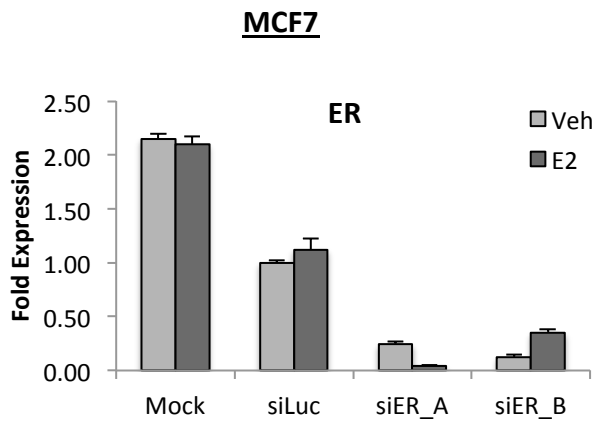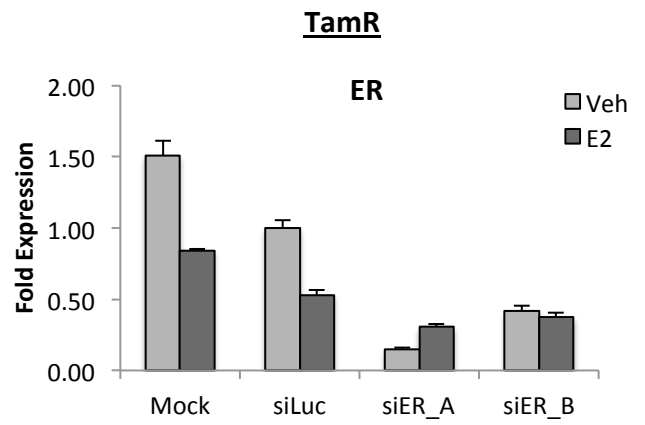

Supplement: NIHMS620369-supplement-5.pdf [file NIHMS620369-supplement-5.pdf]

# Wright et al, Supplementary Figure 5

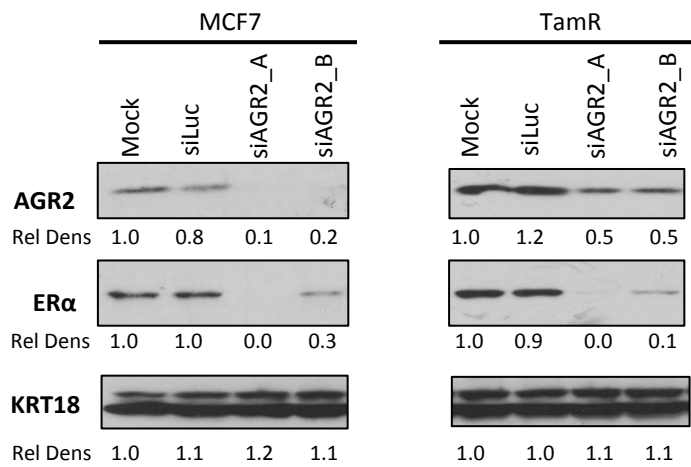

Supplement: NIHMS620369-supplement-6.pdf [file NIHMS620369-supplement-6.pdf]

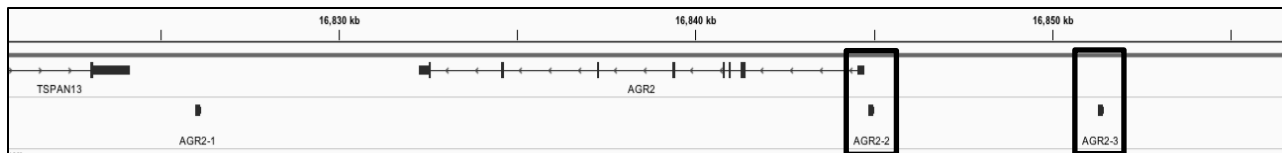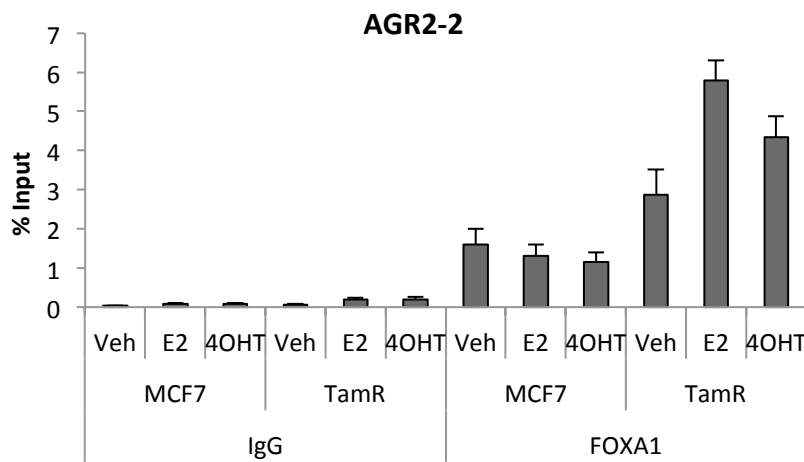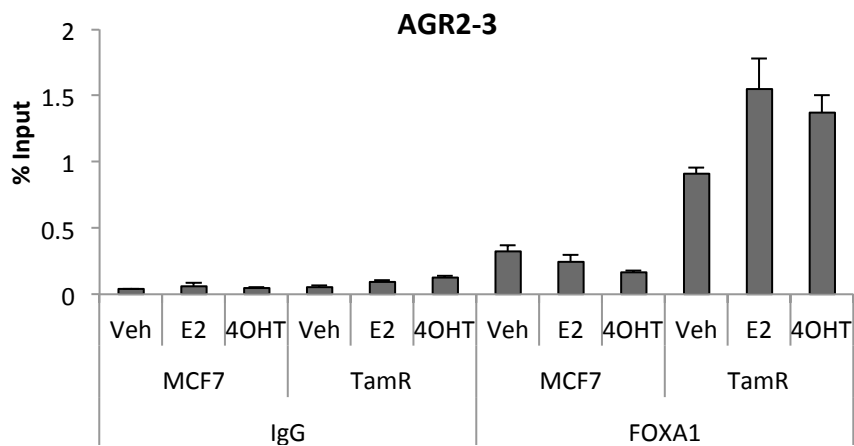

Supplement: NIHMS620369-supplement-7.pdf [file NIHMS620369-supplement-7.pdf]

# Wright et al, Supplementary Figure 7

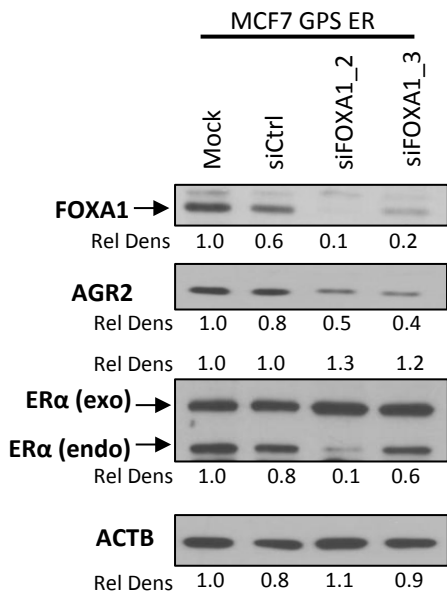

Supplement: NIHMS620369-supplement-8.pdf [file NIHMS620369-supplement-8.pdf]
